# Supplementary material for: Ultratrace level determination and quantitative analysis of kidney injury biomarkers in patient samples attained by zinc oxide nanorods
Source: Royal Society of Chemistry journal article supplement (doi:10.1039/c5nr08706f), 2016-01-01

## **Electronic Supplementary Information:**

# Ultratrace Level Determination and Quantitative Analysis of Kidney Injury Biomarkers in Patient Samples Attained by Zinc Oxide Nanorods

*Manpreet Singh<sup>†</sup>, Anginelle Alabanza<sup>†</sup>, Lorelis E. Gonzalez<sup>†</sup>, Weiwei Wang<sup>‡</sup>, W. Brian Reeves<sup>‡</sup>,  
and Jong-in Hahn<sup>†,\*</sup>*

**Figure S1.** Representative SEM images of the typical ZnO NRs used in the biomarker assays.

The panels are (left) 5  $\mu\text{m}$  x 5  $\mu\text{m}$  and (right) 2  $\mu\text{m}$  x 2  $\mu\text{m}$  in size.

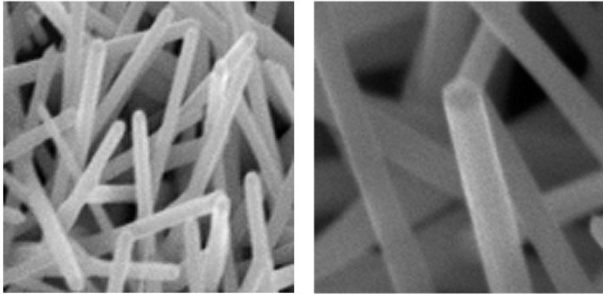

Supplement: c5nr08706f1.pdf [file c5nr08706f1.pdf]
